# Supplementary material for: Pain-causing stinging nettle toxins target TMEM233 to modulate NaV1.7 function
Source: PubMed Central journal article supplement (PMC10147923; doi:10.1038/s41467-023-37963-2), 2023-04-28
Supplement: 41467_2023_37963_MOESM1_ESM.pdf [file 41467_2023_37963_MOESM1_ESM.pdf]

## Supplementary information

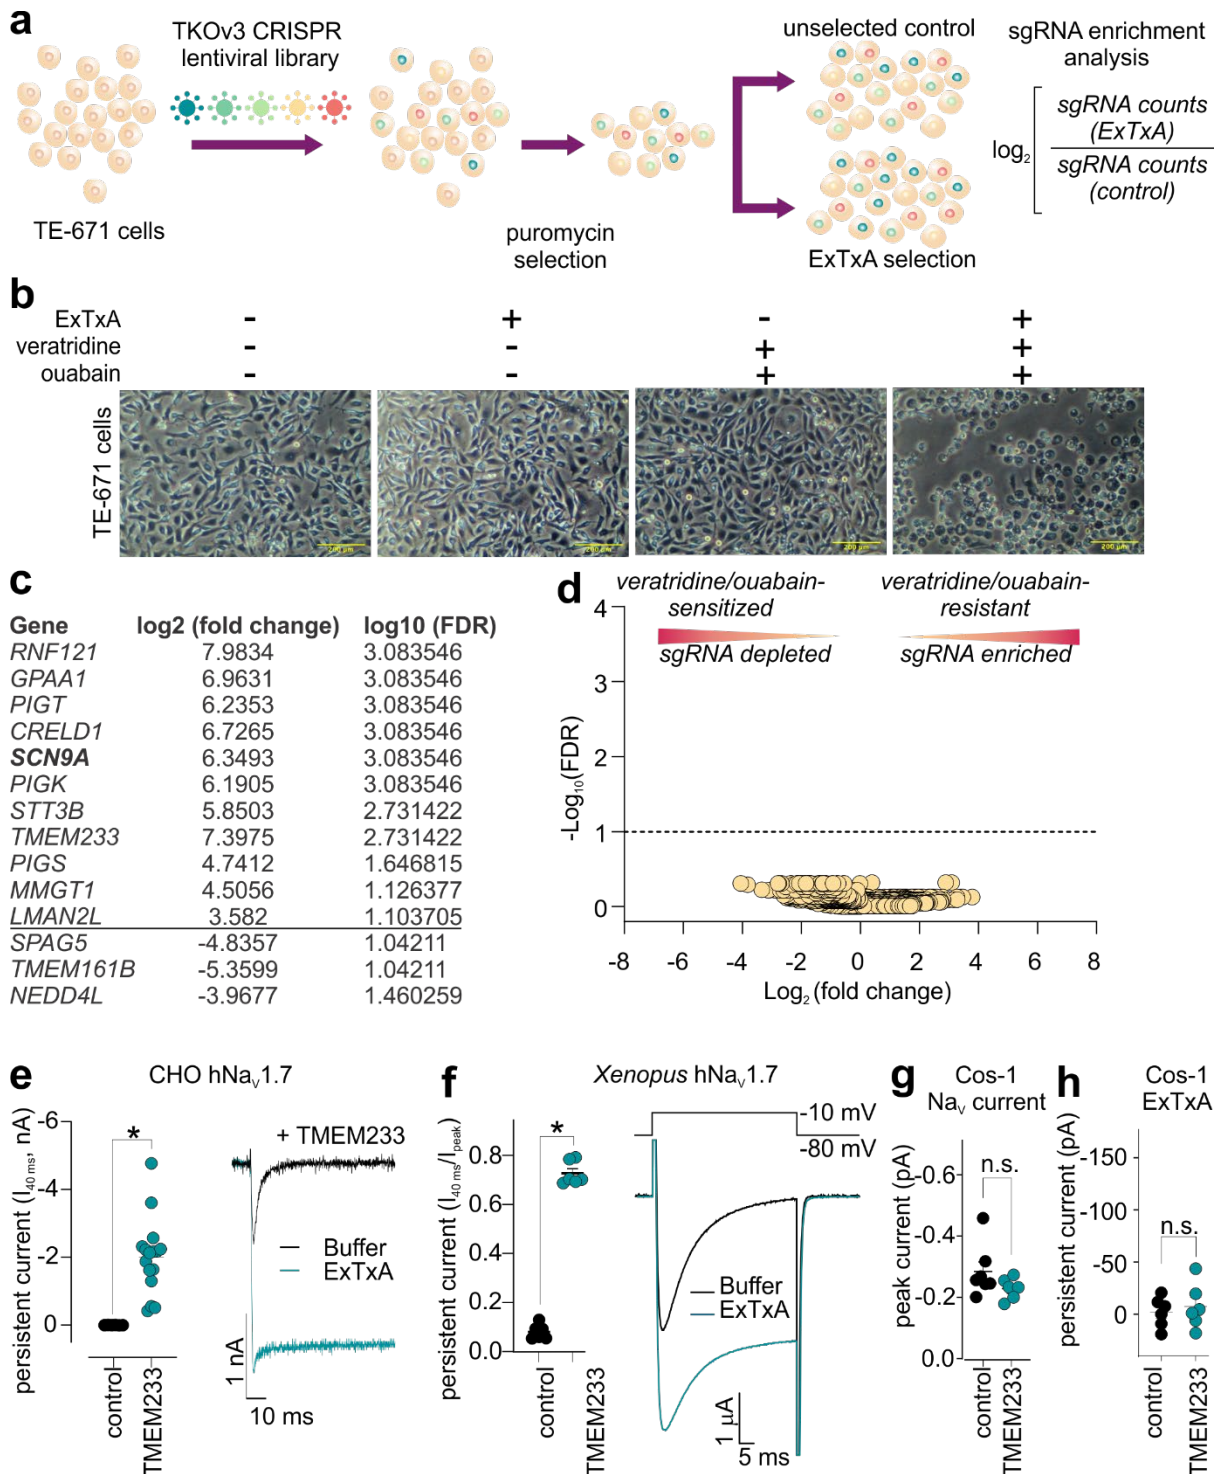

**Supplementary Fig. S1. A CRISPR knockdown screen in TE-671 cells identifies TMEM233 as the molecular target of ExTxA.**

**a)** Schematic illustrating the LentiCRISPR-Cas9 TKOv3 screen used to identify the genes required for ExTxA-induced cytotoxicity. **b)** Representative light microscope images showing

the effect of ExTxA (1  $\mu$ M), veratridine (5  $\mu$ M) and ouabain (20 nM) on viability of TE-671 cells after 24 h. Scale bars, 200  $\mu$ m. **c)** Gene names, log<sub>2</sub> (fold change) and log<sub>10</sub> FDR (false discovery rate) of hits from ExTxA-selection in TE-671 cells. **d)** LentiCRISPR-Cas9 TKOv3 screen showing no depletion or enrichment of sgRNAs in control (untreated) and veratridine/ouabain-treated (veratridine, 5  $\mu$ M; ouabain, 20 nM) TE-671 cells. **e)** ExTxA (1  $\mu$ M)-induced persistent current ( $I_{40\text{ ms}}$ , nA) in CHO cells expressing hNav1.7 alone (control) or co-expressing hNav1.7 and TMEM233 (TMEM233). Right; representative current traces; depolarization to -20 mV from -90 mV holding potential. **f)** ExTxA (1  $\mu$ M)-induced normalized persistent current ( $I_{40\text{ ms}}/I_{\text{peak}}$ ) in Xenopus oocytes expressing hNav1.7 alone (control) or co-expressing hNav1.7 and TMEM233 (TMEM233). Right; representative current traces; depolarization to -10 mV from -80 mV holding potential. **g)** Depolarization-induced (holding potential -90 mV, 50 ms step to -20 mV) peak current (pA) in untransfected Cos-1 cells (control) and Cos-1 cells transfected with TMEM233 only (TMEM233). **h)** ExTxA (1  $\mu$ M)-induced persistent current (40 ms; pA) in untransfected Cos-1 cells (control) and Cos-1 cells transfected with TMEM233 only (TMEM233) during depolarization to -20 mV from a holding potential of -90 mV. Data are shown as mean  $\pm$  SEM; n.s., not significant; \*,  $p < 0.05$ . n values and statistical information are detailed in Supplementary data Table 1. Source data are provided as a Source Data file.

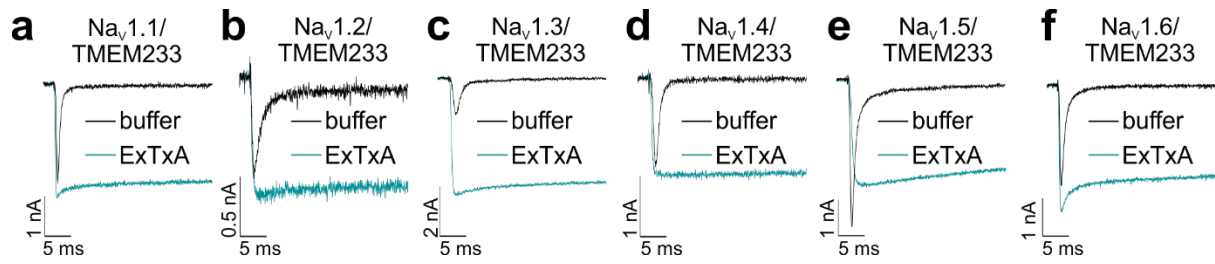

**Supplementary Fig. S2. Co-expression of TMEM233 confers ExTxA sensitivity to Nav1.1-1.6.**

Representative current traces showing ExTxA-induced persistent currents in HEK293 cells expressing **a)**  $Nav1.1 + TMEM233$ , **b)**  $Nav1.2 + TMEM233$ , **c)**  $Nav1.3 + TMEM233$ , **d)**  $Nav1.4 + TMEM233$ , **e)**  $Nav1.5 + TMEM233$ , and **f)**  $Nav1.6 + TMEM233$ .

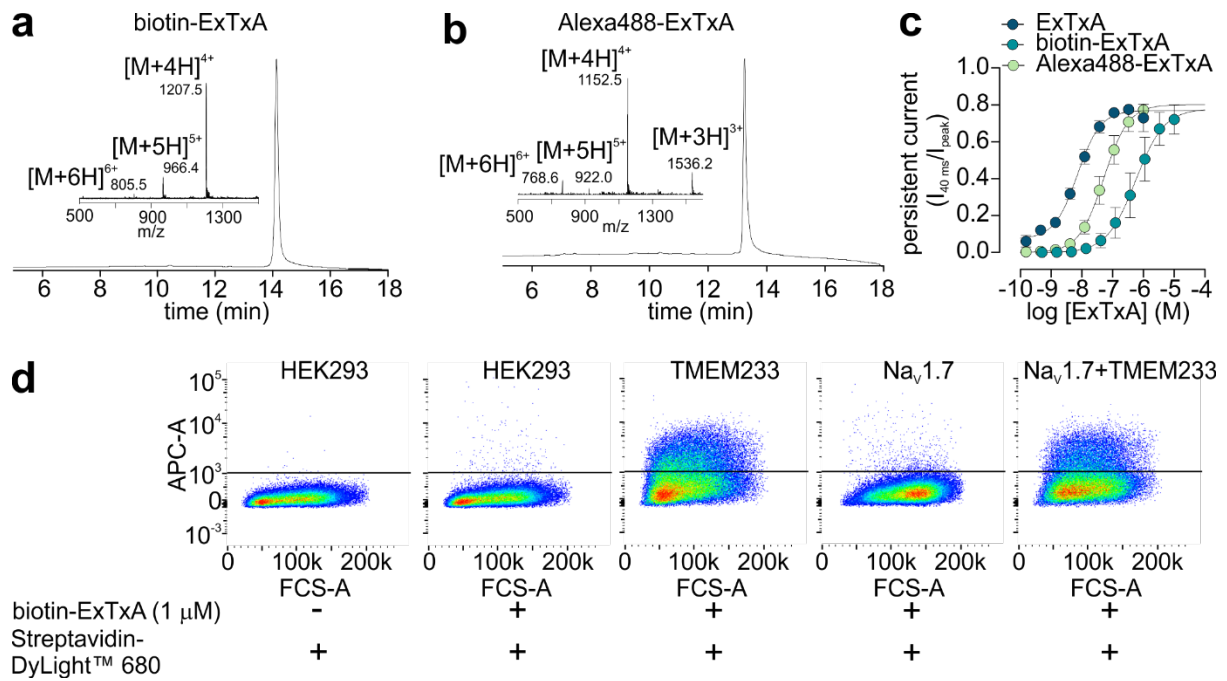

**Supplementary Fig. S3. Biotin- and Alexa488-labelled ExTxA as probes to determine TMEM233 binding.**

UPLC and mass spectrometry profile of **a**) N-terminally biotinylated ExTxA and **b**) N-terminally Alexa488-tagged ExTxA. **c**) Concentration-response of native, biotinylated and Alexa488-tagged ExTxA in HEK293-Nav1.7 cells co-transfected with TMEM233. **d**) Representative flow cytometry analysis of untransfected (HEK293) and TMEM233-transfected HEK293 cells, as well as HEK293 cells expressing hNav1.7 alone (Nav1.7) or co-expressing hNav1.7 and TMEM233 (Nav1.7+TMEM233) stained with biotinylated ExTxA and DyLight<sup>TM</sup>-680-conjugated streptavidin. Solid line indicates cut-off for signal-positive cells. Data in **c**) are shown as mean ± SEM. n values and statistical information are detailed in Supplementary data Table 1.



TMEM233. **b)** Current-voltage (IV) relationship, **c)** conductance-voltage (GV, circles) and steady-state inactivation (squares) curves, **d)**  $V_{50}$  of activation and **e)**  $V_{50}$  of steady-state fast inactivation as well as **f)** time-dependence of recovery from fast inactivation and **g)** (left) peak ramp currents and (right) representative ramp (0.2 mV/s) current traces from HEK293 cells co-expressing Nav1.7 and TMEM233 after the addition of 0.1% BSA (yellow, control) and ExTxA (teal, 1  $\mu$ M in 0.1% BSA). **h)** AlphaFold2 TMEM233 (UniProt ID B4DJY2) structure prediction. Dotted lines indicate approximate locations of plasma membrane. **i)** Sequence alignment of the human dispanins TMEM233 (DSPB2; UniProt ID B4DJY2), PRRT2 (DSPB3; UniProt ID Q7Z6L0), and TRARG1 (DSPB1; UniProt ID Q8LXB3). The large N-terminal domains of PRRT2 and TRARG1 are truncated for clarity. **j)** Representative current traces from HEK293-Nav1.7 cells co-transfected with TMEM233, **k)** PRRT2 or **l)** TRARG1 showing ExTxA (1  $\mu$ M)-induced inhibition of inactivation. Shown is a 50 ms depolarization to -20 mV from a holding potential of -90 mV. Data are shown as mean  $\pm$  SEM; \*,  $p < 0.05$ .  $n$  values and statistical information are detailed in Supplementary data Table 1.

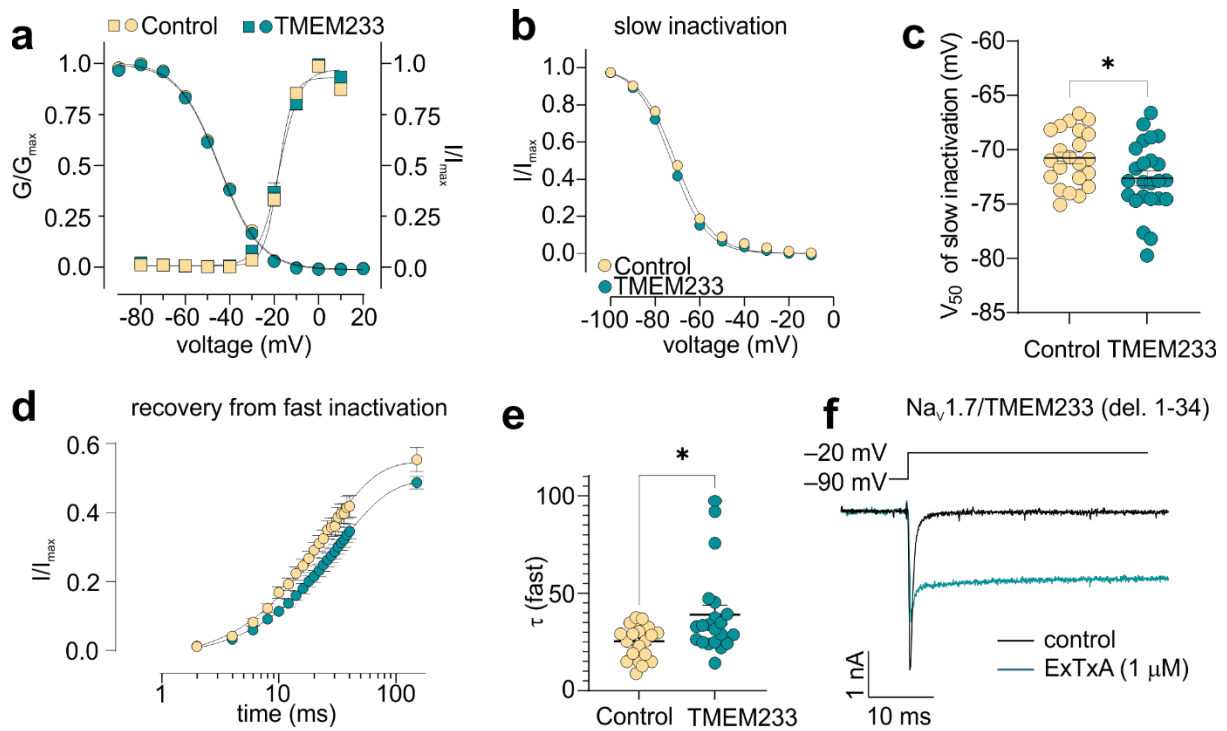

**Supplementary Fig. S5. Effect of TMEM233 co-expression on *Nav1.7* expressed in *Xenopus oocytes*.**

**a)** Superimposed conductance–voltage ( $GV$ , squares) and steady-state fast inactivation (circles) curves of *Xenopus oocytes* expressing *hNav1.7* alone (control, yellow) or co-expressing *hNav1.7* and *TMEM233*-transfected (*TMEM233*, teal). **b)** Voltage-dependence and **c)**  $V_{50}$  of slow inactivation of *hNav1.7* alone (control, yellow) or *hNav1.7* co-expressed with *TMEM233* (*TMEM233*) in *Xenopus oocytes*. **d)** Time-dependence and **e)** time constant  $\tau$  of recovery from fast inactivation of *hNav1.7* alone (control, yellow) or *hNav1.7* co-expressed with *TMEM233* (*TMEM233*) in *Xenopus oocytes*. **f)** Representative current trace of *ExTxA* (1  $\mu\text{M}$ )-induced persistent current in *HEK293-hNav1.7* cells co-expressing N-terminally truncated *TMEM233* (del. 1-34). Data are shown as mean  $\pm$  SEM; \*,  $p < 0.05$ .  $n$  values and statistical information are detailed in Supplementary data Table 1.

**Supplementary Table 1.**

| <b>Figure</b>    | <b>Parameter (units)</b>                                                                 | <b>Group</b>                                | <b>mean ± SEM</b> | <b>n</b> | <b>Statistical test</b>                                                                                                                        |
|------------------|------------------------------------------------------------------------------------------|---------------------------------------------|-------------------|----------|------------------------------------------------------------------------------------------------------------------------------------------------|
| <b>Fig. 1a,b</b> | DRG total persistent Nav current ( $I_{40\text{ ms}}/I_{\text{peak}}$ )                  | Control                                     | 0.027 ± 0.01      | 6        | * p < 0.05 by repeated measures one-way ANOVA with Tukey's multiple comparison test                                                            |
|                  |                                                                                          | ExTxA (100 nM)                              | 0.513 ± 0.10      |          |                                                                                                                                                |
|                  |                                                                                          | ExTxA (100 nM) + TTX (1 μM)                 | 0.001 ± 0.004     |          |                                                                                                                                                |
| <b>Fig. 1c,d</b> | DRG Nav1.8<br>Δ persistent current ( $I_{40\text{ ms}}/I_{\text{peak}}$ ):               | Control                                     | 0.009 ± 0.005     | 13       | p = 0.024 by two-sided Mann-Whitney test                                                                                                       |
|                  |                                                                                          | ExTxA (100 nM)                              | 0.050 ± 0.015     | 13       |                                                                                                                                                |
| <b>Fig. 1e,f</b> | DRG Nav1.9<br>Δ persistent current ( $I_{90\text{ ms}}/I_{\text{peak}}$ ):               | Control                                     | -0.034 ± 0.015    | 9        | p = 0.447 by two-sided t-test                                                                                                                  |
|                  |                                                                                          | ExTxA (1 μM)                                | -0.057 ± 0.028    | 7        |                                                                                                                                                |
| <b>Fig. 1g,h</b> | hiPSC-derived sensory neurons persistent current ( $I_{40\text{ ms}}/I_{\text{peak}}$ ): | Buffer control (0.1% BSA)                   | 0.025 ± 0.009     | 5        | *p = 0.0002 (control vs ExTxA); #, p = 0.0123 (ExTxA vs ExTxA + Pn3a) by Repeated measures one-way ANOVA with Tukey's multiple comparison test |
|                  |                                                                                          | ExTxA (100 nM)                              | 0.151 ± 0.024     |          |                                                                                                                                                |
|                  |                                                                                          | ExTxA (100 nM) + Pn3a (100 nM)              | 0.069 ± 0.012     |          |                                                                                                                                                |
|                  |                                                                                          | ExTxA (100 nM) + Pn3a (100 nM) + TTX (1 μM) | 0.003 ± 0.001     |          |                                                                                                                                                |
| <b>Fig. 1i,j</b> | TE-671 persistent current ( $I_{40\text{ ms}}/I_{\text{peak}}$ )                         | Buffer control                              | 0.021 ± 0.009     | 8        | *,#p < 0.001 by Repeated measures one-way ANOVA with Tukey's multiple comparison test                                                          |
|                  |                                                                                          | ExTxA (100 nM)                              | 0.272 ± 0.018     |          |                                                                                                                                                |
|                  |                                                                                          | ExTxA +Pn3a (1 μM)                          | 0.068 ± 0.011     |          |                                                                                                                                                |
|                  |                                                                                          | ExTxA +Pn3a + TTX (1 μM)                    | 0.025 ± 0.008     |          |                                                                                                                                                |
| <b>Fig. 1k</b>   | cumulative flinches (60 min) following i.pl. ExTxA (10 nM)                               | wt                                          | 319.3 ± 21.9      | 4        | *p < 0.0001 by two-tailed student's t-test                                                                                                     |
|                  |                                                                                          | Nav1.7 <sup>Advill</sup>                    | 40.0 ± 6.5        | 4        |                                                                                                                                                |
| <b>Fig. 2a,b</b> | Δ persistent current ( $I_{40\text{ ms}}/I_{\text{peak}}$ buffer cf. ExTxA)              | HEK293-Nav1.1                               | -0.003 ± 0.0040   | 11       |                                                                                                                                                |
|                  |                                                                                          | HEK293-Nav1.2                               | -0.002 ± 0.0053   | 11       |                                                                                                                                                |



|                  |                                                                               |                                |                   |    |                                                                            |
|------------------|-------------------------------------------------------------------------------|--------------------------------|-------------------|----|----------------------------------------------------------------------------|
|                  |                                                                               | HEK293-Nav1.3                  | 0.0265 ± 0.0049   | 11 | * <i>p</i> < 0.0001 by one-way ANOVA with Tukey's multiple comparison test |
|                  |                                                                               | HEK293-Nav1.4                  | 7.89E-07 ± 0.0005 | 24 |                                                                            |
|                  |                                                                               | HEK293-Nav1.5                  | 0.0004 ± 0.0005   | 9  |                                                                            |
|                  |                                                                               | HEK293-Nav1.6                  | -0.008 ± 0.0103   | 12 |                                                                            |
|                  |                                                                               | HEK293-Nav1.7                  | -0.0004 ± 0.0008  | 8  |                                                                            |
|                  |                                                                               | HEK293-Nav1.8                  | 0.027 ± 0.0057    | 11 |                                                                            |
|                  |                                                                               | ND7/23                         | -0.007 ± 0.0102   | 6  |                                                                            |
|                  |                                                                               | F11                            | 0.0202 ± 0.0041   | 11 |                                                                            |
|                  |                                                                               | SH-SY5Y                        | 0.006 ± 0.0175    | 6  |                                                                            |
|                  |                                                                               | hNav1.7 Xenopus oocytes        | 0.0381 ± 0.0074   | 5  |                                                                            |
|                  |                                                                               | TE-671                         | 0.719 ± 0.0230    | 11 |                                                                            |
| <b>Fig. 2c,d</b> | Δ persistent current ( $I_{40\text{ ms}}/I_{\text{peak}}$ ) in CHO hNav1.7    | no β subunit                   | 0.001 ± 0.004     | 12 | p > 0.05 by one-way ANOVA                                                  |
|                  |                                                                               | β1                             | 0.0001 ± 0.001    | 11 |                                                                            |
|                  |                                                                               | β2                             | -0.002 ± 0.003    | 14 |                                                                            |
|                  |                                                                               | β3                             | -0.001 ± 0.002    | 15 |                                                                            |
|                  |                                                                               | β4                             | -0.004 ± 0.004    | 14 |                                                                            |
| <b>Fig. 3b</b>   | Δ F/F in Nav1.7 HEK293 (ExTxA 1 μM)                                           | Control                        | 0.016 ± 0.013     | 3  | * <i>p</i> < 0.0001 by one-way ANOVA with Tukey's multiple comparison test |
|                  |                                                                               | Creld1                         | 0.001 ± 0.0079    | 3  |                                                                            |
|                  |                                                                               | Lman2L                         | 0.014 ± 0.0048    | 3  |                                                                            |
|                  |                                                                               | Mmgt1                          | 0.0059 ± 0.0015   | 3  |                                                                            |
|                  |                                                                               | RNF121                         | 0.007 ± 0.0074    | 3  |                                                                            |
|                  |                                                                               | Stt3b                          | 0.013 ± 0.00098   | 3  |                                                                            |
|                  |                                                                               | GPI complex                    | 0.0067 ± 0.0034   | 3  |                                                                            |
|                  |                                                                               | TMEM233                        | 0.29 ± 0.0075     | 3  |                                                                            |
| <b>Fig. 3c</b>   | ExTxA-induced persistent current ( $I_{40\text{ ms}}$ ; pA) in HEK293-hNav1.7 | Nav1.7 + ExTxA (1 μM)          | -5.2 ± 3.7        | 11 | * <i>p</i> < 0.0001 by two-tailed student's t-test                         |
|                  |                                                                               | Nav1.7/ TMEM233 + ExTxA (1 μM) | 1,473 ± 407.8     | 4  |                                                                            |

|                |                                                                                            |                                                   |                   |          |                                                                                                                                         |
|----------------|--------------------------------------------------------------------------------------------|---------------------------------------------------|-------------------|----------|-----------------------------------------------------------------------------------------------------------------------------------------|
| <b>Fig. 3d</b> | ExTxA-induced persistent current ( $I_{40\text{ms}}/I_{\text{peak}}$ ; nA) in TE-671 cells | Wildtype + ExTxA (1 $\mu\text{M}$ )               | $0.81 \pm 0.015$  | 7        | *p < 0.0001 by two-tailed student's t-test                                                                                              |
|                |                                                                                            | TMEM233 KO + ExTxA (1 $\mu\text{M}$ )             | $0.047 \pm 0.012$ | 6        |                                                                                                                                         |
| <b>Fig. 3e</b> | ExTxA-induced persistent current ( $I_{40\text{ms}}/I_{\text{peak}}$ ; nA) in DRG neurons  | Wildtype + ExTxA (30 nM)                          | $0.573 \pm 0.086$ | 6        | *p < 0.0001 by two-way ANOVA                                                                                                            |
|                |                                                                                            | Tmem233 <sup>Cre</sup> KO + ExTxA (30 nM)         | $0.114 \pm 0.04$  | 7        |                                                                                                                                         |
| <b>Fig. 3f</b> | ExTxA (10 nM)-induced DRG Ca <sup>2+</sup> responses (% neurons activated)                 | wt                                                | $53.20 \pm 1.789$ | 10 wells | *p < 0.0001 by two-tailed student's t-test                                                                                              |
|                |                                                                                            | Tmem233 <sup>Cre</sup> KO                         | $22.33 \pm 1.942$ | 7 wells  |                                                                                                                                         |
| <b>Fig. 3g</b> | ExTxA (10 nM)-induced pain behaviours                                                      | wt                                                | $234.2 \pm 27.7$  | 17       | *p = 0.037 by two-tailed student's t-test                                                                                               |
|                |                                                                                            | Tmem233 <sup>Cre</sup> KO                         | $115.9 \pm 25.3$  | 16       |                                                                                                                                         |
| <b>Fig. 4a</b> | % positive signal (flow cytometry)                                                         | HEK293 + biotin-ExTxA (1 $\mu\text{M}$ ):         | $0.91 \pm 0.51$   | 3        | *p < 0.05 (HEK293 vs. TMEM233, p = 0.002; HEK293 vs. Nav1.7/TMEM233, p = 0.0015) by one-way ANOVA with Tukey's multiple comparison test |
|                |                                                                                            | TMEM233 + biotin-ExTxA (1 $\mu\text{M}$ )         | $23.00 \pm 2.66$  | 3        |                                                                                                                                         |
|                |                                                                                            | Nav1.7 + biotin-ExTxA (1 $\mu\text{M}$ ):         | $1.23 \pm 0.28$   | 3        |                                                                                                                                         |
|                |                                                                                            | Nav1.7/TMEM233 + biotin-ExTxA (1 $\mu\text{M}$ ): | $17.87 \pm 2.93$  | 3        |                                                                                                                                         |
| <b>Fig. 4b</b> | Max fluorescence (AFU)                                                                     | HEK293 + Alexa488-ExTxA (1 $\mu\text{M}$ ):       | $15,740 \pm 2133$ | 3        |                                                                                                                                         |

|                  |                                                           |                                              |                            |    |                                                                     |
|------------------|-----------------------------------------------------------|----------------------------------------------|----------------------------|----|---------------------------------------------------------------------|
|                  |                                                           | TMEM233 + Alexa488-ExTxA (1 $\mu$ M)         | 38,681 $\pm$ 951.2         | 3  | *p < 0.001 by one-way ANOVA with Tukey's multiple comparison test   |
|                  |                                                           | Nav1.7 + Alexa488-ExTxA (1 $\mu$ M):         | 20,583 $\pm$ 3970          | 3  |                                                                     |
|                  |                                                           | Nav1.7/TMEM233 + Alexa488-ExTxA (1 $\mu$ M): | 38,799 $\pm$ 2471          | 3  |                                                                     |
| <b>Fig. 4d</b>   | persistent current ( $I_{40\text{ ms}}/I_{\text{peak}}$ ) | Nav1.7 + ExTxA (100 nM) in ECS               | 0.04 $\pm$ 0.014           | 10 | *p < 0.0001 by two-way ANOVA with Šídák's multiple comparisons test |
|                  |                                                           | Nav1.7 + ExTxA (100 nM) in ICS               | -0.002 $\pm$ 0.004         | 10 |                                                                     |
|                  |                                                           | Nav1.7/TMEM233 + ExTxA (100 nM) in ECS       | 0.543 $\pm$ 0.061          | 6  |                                                                     |
|                  |                                                           | Nav1.7/TMEM233 + ExTxA (100 nM) in ICS       | 0.003 $\pm$ 0.023          | 6  |                                                                     |
| <b>Fig. 4e,f</b> | % positive signal (flow cytometry)                        | C-terminal HA-tagged TMEM233, permeabilized  | 93.93 $\pm$ 3.526          | 3  | *p < 0.0001 by one-way ANOVA with Tukey's multiple comparison test  |
|                  |                                                           | N-terminal HA-tagged TMEM233, permeabilized  | 93.17 $\pm$ 2.696          | 3  |                                                                     |
|                  |                                                           | C-terminal HA-tagged TMEM233, surface        | 97.00 $\pm$ 0.1732         | 3  |                                                                     |
|                  |                                                           | N-terminal HA-tagged TMEM233, surface        | 15.33 $\pm$ 1.534          | 3  |                                                                     |
| <b>Fig. 4g</b>   | ExTxA EC <sub>50</sub>                                    | Nav1.7/TMEM233                               | 4.3 – 7.9 nM (95% CI)      | 7  | p < 0.05 by one-way ANOVA with Tukey's multiple comparison test     |
|                  |                                                           | Nav1.7/PRRT2                                 | 128.2 – 611.0 nM (95% CI)  | 10 |                                                                     |
|                  |                                                           | Nav1.7/TRARG1                                | 308.6 – 6570.0 nM (95% CI) | 7  |                                                                     |

|                    |                                              |                                                   |                                                                                                             |    |                                                                    |
|--------------------|----------------------------------------------|---------------------------------------------------|-------------------------------------------------------------------------------------------------------------|----|--------------------------------------------------------------------|
| <b>Fig. 5e</b>     | Proximity ligation assay<br>(particles/cell) | HEK293 $\beta$ 1/ $\beta$ 2 control               | $2.94 \pm 0.21$                                                                                             | 3  | *p < 0.0001 by one-way ANOVA with Tukey's multiple comparison test |
|                    |                                              | FLAG-tagged Nav1.7                                | $5.25 \pm 1.68$                                                                                             | 3  |                                                                    |
|                    |                                              | N-terminal HA-tagged TMEM233                      | $7.49 \pm 1.82$                                                                                             | 3  |                                                                    |
|                    |                                              | FLAG-tagged Nav1.7 + N-terminal HA-tagged TMEM233 | $36.72 \pm 5.22$                                                                                            | 3  |                                                                    |
| <b>Fig. 6c,d,e</b> | $V_{50}$ of activation (mV)                  | Nav1.7                                            | $-26.11 \pm 1.74$                                                                                           | 6  | p > 0.05 by two-sided student's t-test                             |
|                    |                                              | Nav1.7/TMEM233                                    | $-26.55 \pm 1.40$                                                                                           | 11 |                                                                    |
|                    | $V_{50}$ of inactivation (mV)                | Nav1.7                                            | $-64.95 \pm 0.76$                                                                                           | 6  | *p = 0.0045 by two-sided student's t-test                          |
|                    |                                              | Nav1.7/TMEM233                                    | $-68.89 \pm 0.76$                                                                                           | 11 |                                                                    |
| <b>Fig. 6f</b>     | Slow inactivation best-fit parameters        | Nav1.7                                            | 95% CI<br>Bottom: 0.36 to 0.41<br>Top: 0.97 to 1.02<br>$V_{50}$ : -60.99 to -57.13<br>Slope: -9.57 to -4.03 | 11 |                                                                    |
|                    |                                              | Nav1.7/TMEM233                                    | 95% CI<br>Bottom: 0.19 to 0.26<br>Top: 0.99 to 1.07<br>$V_{50}$ : -67.99 to -63.27<br>Slope: -9.11 to -5.16 | 13 |                                                                    |
| <b>Fig. 6g</b>     | $V_{50}$ of slow inactivation (mV)           | Nav1.7                                            | $-59.66 \pm 0.61$                                                                                           | 11 | *p = 0.0108 by two-tailed student's t-test                         |
|                    |                                              | Nav1.7/TMEM233                                    | $-65.18 \pm 1.74$                                                                                           | 13 |                                                                    |

|                              |                                                                                  |                                             |                    |    |                                                                    |
|------------------------------|----------------------------------------------------------------------------------|---------------------------------------------|--------------------|----|--------------------------------------------------------------------|
| <b>Fig. 6h,i</b>             | $\tau$ of fast inactivation                                                      | Nav1.7                                      | $6.70 \pm 0.75$    | 8  | *p = 0.0236 by two-tailed student's t-test                         |
|                              |                                                                                  | Nav1.7/TMEM233                              | $9.64 \pm 0.73$    | 18 |                                                                    |
| <b>Fig. 6j</b>               | Ramp currents (1 mV/ms) (nA)                                                     | Nav1.7                                      | $-0.18 \pm 0.04$   | 11 | p > 0.05 by two-tailed student's t-test                            |
|                              |                                                                                  | Nav1.7/TMEM233                              | $-0.12 \pm 0.01$   | 9  |                                                                    |
| <b>Fig. 6l</b>               | Use-dependence ( $I_{\text{first}}/I_{\text{last}}$ @ 20 mHz)                    | Nav1.7                                      | $0.80 \pm 0.03$    | 8  | *p = 0.016 by two-way ANOVA with Šídák's multiple comparisons test |
|                              |                                                                                  | Nav1.7/TMEM233                              | $0.68 \pm 0.07$    | 6  |                                                                    |
| <b>Fig. 6m</b>               | $\tau$ of fast inactivation                                                      | Nav1.7                                      | $6.05 \pm 0.52$    | 16 | *p < 0.05 by one-way ANOVA with Tukey's multiple comparison test   |
|                              |                                                                                  | Nav1.7/TMEM233                              | $10.53 \pm 1.07$   | 7  |                                                                    |
|                              |                                                                                  | Nav1.7/del.1-34 TMEM233                     | $6.29 \pm 0.49$    | 7  |                                                                    |
|                              |                                                                                  | Buffer control                              | $6.91 \pm 0.39$    | 9  |                                                                    |
|                              |                                                                                  | N-terminal TMEM233 peptide                  | $10.18 \pm 1.30$   | 9  |                                                                    |
| <b>Supplementary figures</b> |                                                                                  |                                             |                    |    |                                                                    |
| <b>Fig. 1e</b>               | CHO cells persistent current ( $I_{40 \text{ ms}}$ , nA)                         | hNav1.7 + ExTxA (1 $\mu\text{M}$ )          | $0.000 \pm 0.002$  | 6  | *p = 0.0003 by two-tailed student's t-test                         |
|                              |                                                                                  | hNav1.7/ TMEM233 + ExTxA (1 $\mu\text{M}$ ) | $-2.010 \pm 0.277$ | 16 |                                                                    |
| <b>Fig. 1f</b>               | <i>Xenopus oocyte</i> persistent current ( $I_{40 \text{ ms}}/I_{\text{peak}}$ ) | hNav1.7 + ExTxA (1 $\mu\text{M}$ )          | $0.081 \pm 0.012$  | 6  | *p < 0.0001 by two-tailed student's t-test                         |
|                              |                                                                                  | hNav1.7/ TMEM233 + ExTxA (1 $\mu\text{M}$ ) | $0.727 \pm 0.020$  | 6  |                                                                    |
| <b>Fig. 1g</b>               | Cos-1 cells Peak current (pA)                                                    | control                                     | $-284.6 \pm 31.92$ | 7  | p > 0.05 by two-tailed student's t-test                            |
|                              |                                                                                  | TMEM233                                     | $-228.9 \pm 14.15$ | 6  |                                                                    |
| <b>Fig. 1h</b>               | Cos-1 cells                                                                      | Cos-1 + ExTxA (1 $\mu\text{M}$ )            | $-2.019 \pm 5.908$ | 6  | p > 0.05 by two-tailed                                             |

|                    |                                                   |                                    |                                                                                      |   |                                            |
|--------------------|---------------------------------------------------|------------------------------------|--------------------------------------------------------------------------------------|---|--------------------------------------------|
|                    | ExTxA (1 $\mu$ M)-induced persistent current (pA) | Cos-1/TMEM233 + ExTxA (1 $\mu$ M)  | $-7.493 \pm 8.833$                                                                   | 6 | student's t-test                           |
| <b>Fig. 3c</b>     | Best-fit parameters                               | ExTxA                              | Bottom: 0.0729<br>Top: 0.7692<br>logEC <sub>50</sub> : -8.146<br>Hill slope: 1.156   | 7 |                                            |
|                    |                                                   | Biotin-ExTxA                       | Bottom: -0.0014<br>Top: 0.7788<br>logEC <sub>50</sub> : -6.256<br>Hill slope: 0.9303 | 6 |                                            |
|                    |                                                   | Alexa488-ExTxA                     | Bottom: 0.00002<br>Top: 0.8013<br>logEC <sub>50</sub> : -7.290<br>Hill slope: 1.084  | 7 |                                            |
| <b>Fig. 4b,c,d</b> | V <sub>50</sub> of activation (mV)                | Nav1.7/TMEM233                     | $-24.31 \pm 1.11$                                                                    | 7 | *p < 0.0001 by two-tailed student's t-test |
|                    |                                                   | Nav1.7/TMEM233 + ExTxA (1 $\mu$ M) | $-35.92 \pm 1.00$                                                                    | 7 |                                            |
| <b>Fig. 4c,e</b>   | V <sub>50</sub> of inactivation (mV)              | Nav1.7/TMEM233                     | $-67.77 \pm 1.12$                                                                    | 8 | *p < 0.0001 by two-tailed Student's t-test |
|                    |                                                   | Nav1.7/TMEM233 + ExTxA (1 $\mu$ M) | $-49.80 \pm 3.20$                                                                    | 8 | *p < 0.0001 by two-tailed student's t-test |
| <b>Fig. 4f</b>     | $\tau_1$ (recovery from fast inactivation)        | Nav1.7/TMEM233                     | $7.23 \pm 0.41$                                                                      | 9 | *p < 0.0001 by two-tailed student's t-test |
|                    |                                                   | Nav1.7/TMEM233 + ExTxA (1 $\mu$ M) | $1.17 \pm 0.52$                                                                      | 9 |                                            |
| <b>Fig. 4g</b>     | Ramp current (0.2 mV/s) (nA)                      | Nav1.7/TMEM233                     | $-0.075 \pm 0.012$                                                                   | 9 | *p < 0.0001 by two-tailed student's t-test |
|                    |                                                   | Nav1.7/TMEM233 + ExTxA (1 $\mu$ M) | $-1.952 \pm 0.950$                                                                   | 8 |                                            |

|                  |                                                  |                |               |    |                                            |
|------------------|--------------------------------------------------|----------------|---------------|----|--------------------------------------------|
| <b>Fig. 5a</b>   | V <sub>50</sub> of activation (mV)               | Nav1.7         | -17.53 ± 0.69 | 27 | p > 0.05 by two-tailed student's t-test    |
|                  |                                                  | Nav1.7/TMEM233 | -17.38 ± 1.05 | 27 |                                            |
|                  | V <sub>50</sub> of inactivation (mV)             | Nav1.7         | -44.82 ± 0.54 | 22 | p > 0.05 by two-tailed student's t-test    |
|                  |                                                  | Nav1.7/TMEM233 | -44.99 ± 0.72 | 24 |                                            |
| <b>Fig. 5b,c</b> | V <sub>50</sub> of slow inactivation (mV)        | Nav1.7         | -70.76 ± 0.54 | 22 | p = 0.036 by two-tailed student's t-test   |
|                  |                                                  | Nav1.7/TMEM233 | -72.63 ± 0.66 | 24 |                                            |
| <b>Fig. 5d,e</b> | τ <sub>1</sub> (recovery from fast inactivation) | Nav1.7         | 25.35 ± 1.89  | 21 | *p = 0.0125 by two-tailed student's t-test |
|                  |                                                  | Nav1.7/TMEM233 | 39.01 ± 4.86  | 21 |                                            |
